# Supplementary material for: The Association of Vitamin D Receptor Polymorphisms with COVID-19 Severity
Source: MDPI journal article supplement (doi:10.3390/nu16050727), 2024-03-02
Supplement: s1 [file s1]

**Suppl. Table 1. The association of FokI, ApaI, and BsmI polymorphisms with COVID-19 severity**

| <b>SNP Genotypes</b>    | <b>Controls/<br/>Mild symptoms</b> | <b>Severe<br/>Symptoms</b> | <b>Analysis Model</b>          | <b>OR</b> | <b>95%CI</b> | <b>p-<br/>value</b> | <b>HWE<br/>control<br/>group<br/>(p-<br/>value)</b> | <b>in<br/>(p-<br/>value)</b> |
|-------------------------|------------------------------------|----------------------------|--------------------------------|-----------|--------------|---------------------|-----------------------------------------------------|------------------------------|
| <b>FokI (rs2228570)</b> |                                    |                            |                                |           |              |                     |                                                     |                              |
| <b>CC</b>               | 58                                 | 41                         | Additive<br>(CC vs. CT vs. TT) |           |              | 0.47                | 0.72                                                |                              |
| <b>CT</b>               | 54                                 | 33                         |                                |           |              |                     |                                                     |                              |
| <b>TT</b>               | 11                                 | 12                         |                                |           |              |                     |                                                     |                              |
| <b>CC</b>               | 58                                 | 41                         | Homozygous<br>(TT vs. CC)      | 1.54      | 0.62-3.84    | 0.35                |                                                     |                              |
| <b>TT</b>               | 11                                 | 12                         |                                |           |              |                     |                                                     |                              |
| <b>CC</b>               | 58                                 | 41                         | Heterozygous<br>(CT vs. CC)    | 0.86      | 0.48-1.56    | 0.63                |                                                     |                              |
| <b>CT</b>               | 54                                 | 33                         |                                |           |              |                     |                                                     |                              |
| <b>CC</b>               | 58                                 | 41                         | Dominant<br>(CT+TT vs. CC)     | 0.98      | 0.56-1.7     | 0.94                |                                                     |                              |
| <b>CT+TT</b>            | 65                                 | 45                         |                                |           |              |                     |                                                     |                              |
| <b>CT+CC</b>            | 112                                | 74                         | Recessive<br>(TT vs. CT+CC)    | 1.65      | 0.69-3.94    | 0.26                |                                                     |                              |
| <b>TT</b>               | 11                                 | 12                         |                                |           |              |                     |                                                     |                              |
| <b>C</b>                | 170                                | 115                        | Allelic (T vs. C)              | 1.11      | 0.73-1.68    | 0.63                |                                                     |                              |
| <b>T</b>                | 76                                 | 57                         |                                |           |              |                     |                                                     |                              |
| <b>ApaI (rs79752)</b>   |                                    |                            |                                |           |              |                     |                                                     |                              |
|                         |                                    |                            |                                |           |              |                     |                                                     |                              |
| <b>TT</b>               | 44                                 | 35                         | Additive<br>(TT vs. TG vs. GG) |           |              | 0.53                | 0.13                                                |                              |
| <b>TG</b>               | 72                                 | 44                         |                                |           |              |                     |                                                     |                              |
| <b>GG</b>               | 7                                  | 7                          |                                |           |              |                     |                                                     |                              |
| <b>TT</b>               | 44                                 | 35                         | Homozygous<br>(GG vs. TT)      | 1.26      | 0.4-3.92     | 0.69                |                                                     |                              |
| <b>GG</b>               | 7                                  | 7                          |                                |           |              |                     |                                                     |                              |
| <b>TT</b>               | 44                                 | 35                         | Heterozygous<br>(TG vs. TT)    | 0.77      | 0.43-1.37    | 0.37                |                                                     |                              |
| <b>TG</b>               | 72                                 | 44                         |                                |           |              |                     |                                                     |                              |
| <b>TT</b>               | 44                                 | 35                         | Dominant<br>(TG+GG vs. TT)     | 0.81      | 0.46-1.43    | 0.47                |                                                     |                              |
| <b>TG+GG</b>            | 79                                 | 51                         |                                |           |              |                     |                                                     |                              |
| <b>TG+TT</b>            | 116                                | 79                         | Recessive<br>(GG vs. TG+TT)    | 1.47      | 0.5-4.35     | 0.49                |                                                     |                              |
| <b>GG</b>               | 7                                  | 7                          |                                |           |              |                     |                                                     |                              |
| <b>T</b>                | 160                                | 114                        | Allelic (G vs. T)              | 0.95      | 0.63-1.43    | 0.79                |                                                     |                              |
| <b>G</b>                | 86                                 | 58                         |                                |           |              |                     |                                                     |                              |
| <b>BsmI (rs1544410)</b> |                                    |                            |                                |           |              |                     |                                                     |                              |
| <b>AA</b>               | 27                                 | 27                         | Additive<br>(AA vs. AG vs. GG) |           |              | 0.15                | 0.8                                                 |                              |
| <b>AG</b>               | 66                                 | 35                         |                                |           |              |                     |                                                     |                              |
| <b>GG</b>               | 30                                 | 24                         |                                |           |              |                     |                                                     |                              |
| <b>AA</b>               | 27                                 | 27                         | Homozygous<br>(GG vs. AA)      | 0.8       | 0.38-1.71    | 0.56                |                                                     |                              |
| <b>GG</b>               | 30                                 | 24                         |                                |           |              |                     |                                                     |                              |
| <b>AA</b>               | 27                                 | 27                         | Heterozygous<br>(AG vs. AA)    | 0.53      | 0.27-1.04    | 0.06                |                                                     |                              |
| <b>AG</b>               | 66                                 | 35                         |                                |           |              |                     |                                                     |                              |
| <b>AA</b>               | 27                                 | 27                         | Dominant<br>(AG+GG vs. AA)     | 0.61      | 0.33-1.15    | 0.13                |                                                     |                              |
| <b>AG+GG</b>            | 96                                 | 59                         |                                |           |              |                     |                                                     |                              |
| <b>AG+AA</b>            | 93                                 | 62                         | Recessive<br>(GG vs. AG+AA)    | 1.2       | 0.64-2.24    | 0.57                |                                                     |                              |
| <b>GG</b>               | 30                                 | 24                         |                                |           |              |                     |                                                     |                              |
| <b>A</b>                | 120                                | 89                         | Allelic (G vs. A)              | 0.89      | 0.6-1.31     | 0.55                |                                                     |                              |
| <b>G</b>                | 126                                | 83                         |                                |           |              |                     |                                                     |                              |

P values are for the comparisons between the two groups by Chi-squared test.

SNP, single nucleotide polymorphism, OR: odds ratio, CI: confidence interval, HWE: hardy-weinberg equilibrium.
